# Supplementary material
Source: PubMed Central journal article supplement (PMC454202)

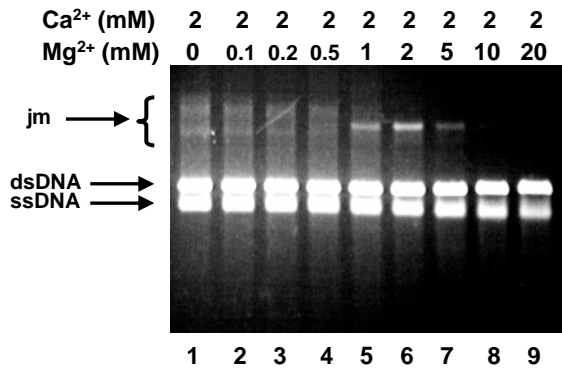

Supplement: pnas_101_27_9988__1.pdf [file pnas_101_27_9988__1.pdf]

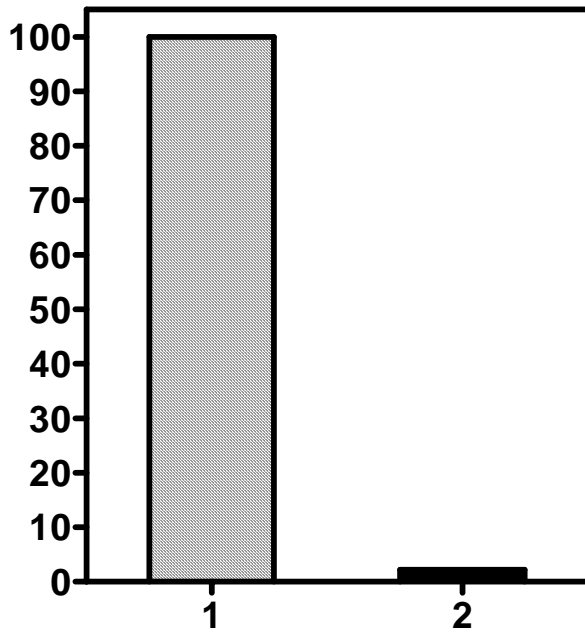

Supplement: pnas_101_27_9988__2.pdf [file pnas_101_27_9988__2.pdf]

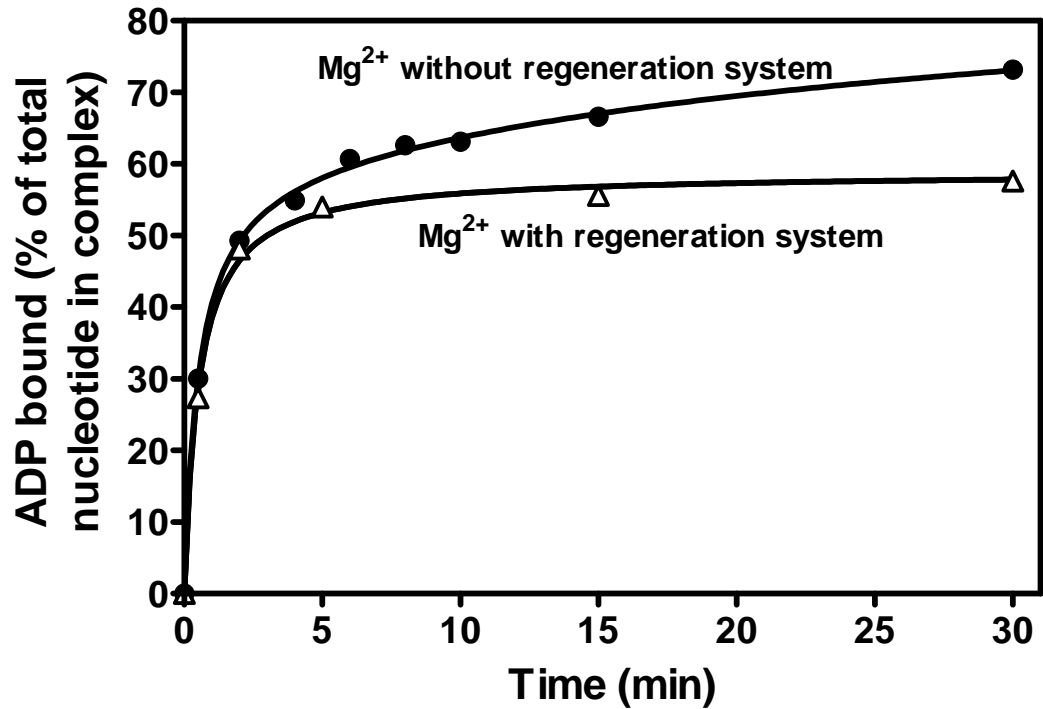

Supplement: pnas_101_27_9988__3.pdf [file pnas_101_27_9988__3.pdf]

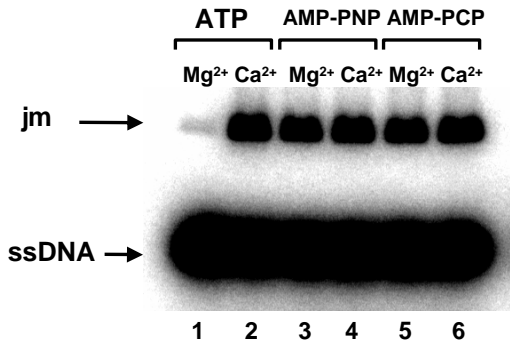

Supplement: pnas_101_27_9988__4.pdf [file pnas_101_27_9988__4.pdf]
